# Supplementary material for: Restoring Insulin Secretion (RISE): Design of Studies of β-Cell Preservation in Prediabetes and Early Type 2 Diabetes Across the Life Span
Source: PubMed Central journal article supplement — Diabetes Care. 2014 Feb 11;37(3):780–8. doi: 10.2337/dc13-1879 (PMC3931376; doi:10.2337/dc13-1879), 2014-02-11
Supplement: supp_dc13-1879v131879_DC131879SupplementaryData.pdf [file supp_dc13-1879v131879_DC131879SupplementaryData.pdf]

SUPPLEMENTARY DATA

**RISE Consortium Investigators  
June 2013**

***University of Chicago Clinical Research Center  
(Chicago, IL)***

David Ehrmann, MD\*  
Babak Mokhlesi, MD MSc  
Eve Van Cauter, PhD

***VA Puget Sound Healthcare System and University of Washington  
(Seattle, WA)***

Steven E. Kahn, MB, ChB\*  
Brenda K. Montgomery, RN, BSN, CDE\*\*  
Jerry Palmer, MD  
Kristina Utzschneider, MD

***Indiana University School of Medicine  
(Indianapolis, IN)***

Kieren J. Mather, MD\*  
Robin Chisholm, RN\*\*  
Tamara Hannon, MD

***University of Colorado Denver/Children's Hospital Colorado  
(Denver, CO)***

Kristen Nadeau, MD, MS\*  
Phil Zeitler, MD

***Children's Hospital of Pittsburgh of UPMC  
(Pittsburgh, PA)***

Silva Arslanian, MD\*

***Department of Pediatrics, Yale University  
(New Haven, CT)***

Sonia Caprio, MD\*

***University of Southern California Keck School of Medicine/Kaiser Permanente Southern California  
(Los Angeles, CA)***

Thomas Buchanan, MD\*  
Anny Xiang, PhD

***George Washington University Biostatistics Center  
(RISE Coordinating Center Rockville, MD)***

Sharon L. Edelstein, ScM\*  
John M. Lachin, ScD

***NIH/NIDDK  
(Bethesda, MD)***

Peter J. Savage, MD

\* denotes Principal Investigator

SUPPLEMENTARY DATA

\*\* denotes Program Coordinator
